# Supplementary material for: Differential protein expression of a streptomycin-resistantStreptomyces albulusmutant in high yield production of ε-poly-l-lysine: a proteomics study
Source: Royal Society of Chemistry journal article supplement (doi:10.1039/c9ra03156a), 2019-01-01

**Differential protein expression of a streptomycin-resistant  
*Streptomyces albulus* mutant in high yield production of  $\epsilon$ -  
poly-L-lysine: a proteomics study**

**Yongjuan Liu · Xusheng Chen\* · Long Pan · Zhonggui Mao\***

Key Laboratory of Industrial Biotechnology, Ministry of Education, School of  
Biotechnology, Jiangnan University, Wuxi 214122, China

\*Correspondence to Dr. Chen or Prof. Mao, School of Biotechnology, Jiangnan  
University, 1800 Lihu Road, Wuxi 214122, Jiangsu, China

Tel & Fax: 0086-510-85918279

chenxs@jiangnan.edu.cn (Dr. Chen); maozg@jiangnan.edu.cn (Prof. Mao)

**Supplementary File 1** Genes *frr* and *pls* in combination into the integrating vector pIB139, respectively. Promoter *ermE\** is a strong constitutive promoter for expression in *S. albulus* M-Z18.

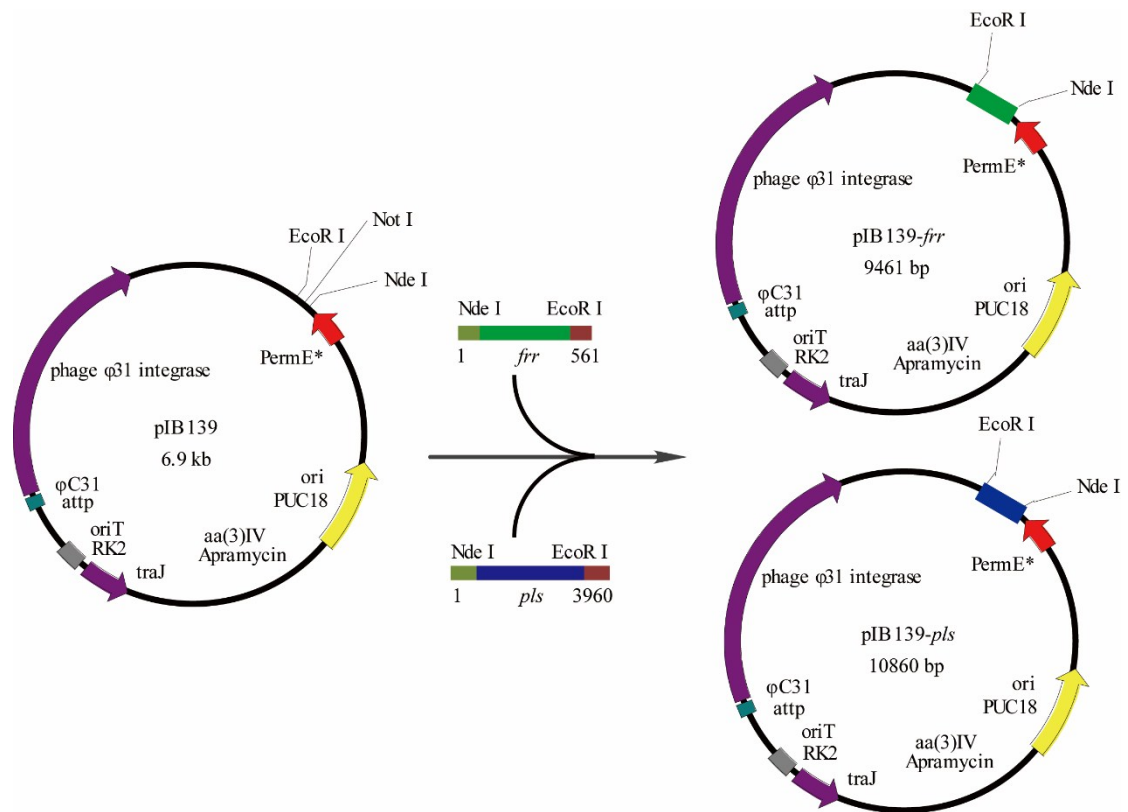

Supplementary Files 2 Fermentation parameters of the parent strain and recombinant strain. A, Construction of the recombinant strain M-Z18 (pIB139-*hrdD*); B, Verification of overexpression vector pIB39-*hrdD* by double enzyme digestion (M: Marker; 1: pIB-*hrdD*); C, Fermentation parameters of the parent strain *S. albulus* M-Z18 and overexpressed strain *S. albulus* M-Z18-*hrdD*.

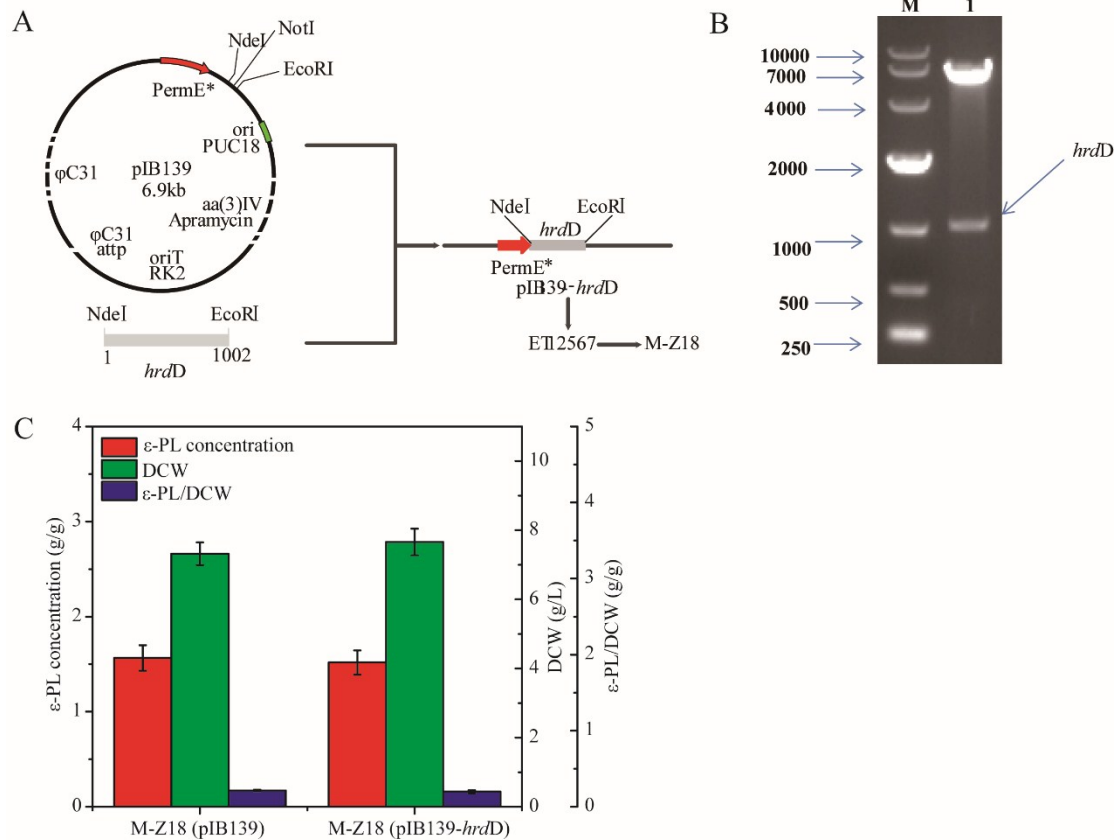

Supplementary Files 3 Cultivation characteristics of M-Z18 and SS-62 in solid and liquid cultures. A, M-Z18; B, SS-62. 1, 4: colony characterized by camera and scanning electron microscope (SEM); 2, 5: spore characterized by camera and SEM; 3, 6: mycelial pellet characterized by microphotography and SEM.

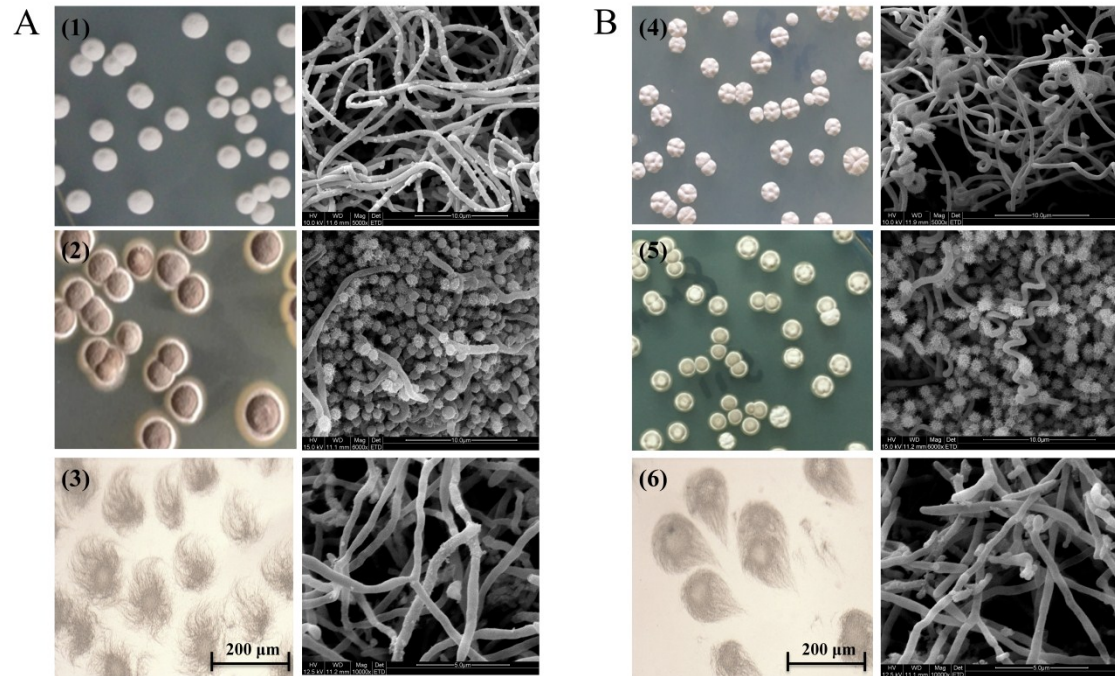

Supplement: c9ra03156a1.pdf [file c9ra03156a1.pdf]
